# Supplementary material for: Preliminary Investigation towards the Use of Infrared Technology for Raw Milk Treatment
Source: MDPI journal article supplement (doi:10.3390/foods13071117), 2024-04-06
Supplement: s1 [file s1]

**Table S1.** VOCs profile of raw non homogenized milk before and after IR treatment with different energies.

| Rt                       | Compound                    | Raw milk<br>(n=3) | s.d.<br>(±) | IR60<br>(n=3)   | s.d.<br>(±) | IR70<br>(n=3)   | s.d.<br>(±) | IR80<br>(n=3)   | s.d.<br>(±) | IR85<br>(n=3)   | s.d.<br>(±) |
|--------------------------|-----------------------------|-------------------|-------------|-----------------|-------------|-----------------|-------------|-----------------|-------------|-----------------|-------------|
| <i>Aldehydes</i>         |                             |                   |             |                 |             |                 |             |                 |             |                 |             |
| 8.98                     | Hexanal                     | 0.08              | 0.16        | n.d.            | -           | 0.32            | 0.63        | 2.90            | 1.39        | 4.21*           | 1.63        |
| <b>Total</b>             |                             | <b>0.08</b>       |             | <b>n.d.</b>     |             | <b>0.32</b>     |             | <b>2.90</b>     |             | <b>4.21*</b>    |             |
| <i>Ketones</i>           |                             |                   |             |                 |             |                 |             |                 |             |                 |             |
| 2.26                     | 2-Propanone                 | 1212.95           | 268.77      | 1405.73         | 328.22      | 1369.23*        | 253.92      | 1553.42*        | 472.97      | 1613.35*        | 583.46      |
| 3.12                     | 2-Butanone                  | 282.75            | 47.46       | 268.61          | 103.14      | 263.53          | 67.60       | 284.33          | 99.82       | 282.95          | 86.80       |
| 13.01                    | 2-Heptanone, 6-methyl-      | 0.26              | 0.29        | 0.55            | 0.29        | 0.89            | 0.27        | 2.93*           | 2.00        | 5.01*           | 3.61        |
| 13.83                    | 2-Heptanone                 | 0.49              | 0.33        | 0.80            | 0.80        | 0.53            | 0.37        | 0.33            | 0.12        | 0.37            | 0.22        |
| 14.82                    | Propanone, 1,1-dichloro-    | 0.19              | 0.19        | 0.21            | 0.11        | 0.38            | 0.21        | 1.05*           | 0.80        | 1.77*           | 1.29        |
| 17.67                    | 3-Hydroxy-2-butanone        | 1.46              | 1.84        | 2.08*           | 2.81        | 2.02*           | 2.43        | 1.06            | 0.84        | 0.74            | 0.24        |
| <b>Total</b>             |                             | <b>1498.11</b>    |             | <b>1677.98*</b> |             | <b>1636.58*</b> |             | <b>1843.13*</b> |             | <b>1904.19*</b> |             |
| <i>Sulphur compounds</i> |                             |                   |             |                 |             |                 |             |                 |             |                 |             |
| 1.9                      | Dimethyl sulphide           | 48.37             | 15.09       | 58.57*          | 25.59       | 57.37*          | 20.13       | 57.78*          | 19.86       | 58.76*          | 20.86       |
| 8.32                     | Dimethyl disulphide         | n.d.              | -           | 0.23            | 0.27        | 0.05            | 0.09        | 0.33            | 0.46        | 0.12            | 0.11        |
| 31.05                    | Dimethyl sulphone           | 10.76             | 6.48        | 10.08           | 5.06        | 14.79           | 2.94        | 13.00           | 4.15        | 26.40*          | 11.63       |
| <b>Total</b>             |                             | <b>59.13</b>      |             | <b>68.88*</b>   |             | <b>72.21*</b>   |             | <b>71.11*</b>   |             | <b>85.28*</b>   |             |
| <i>Carboxylic acids</i>  |                             |                   |             |                 |             |                 |             |                 |             |                 |             |
| 22.20                    | Acetic acid                 | 1.13              | 0.77        | 0.79            | 0.40        | 1.02            | 0.42        | 0.83            | 0.37        | 1.10            | 0.40        |
| 26.12                    | Butanoic acid               | 11.04             | 9.59        | 18.46           | 16.25       | 27.15*          | 9.51        | 11.61           | 13.14       | 19.56           | 14.38       |
| 30.28                    | Hexanoic acid               | 4.39              | 3.43        | 6.78            | 5.54        | 9.07*           | 2.04        | 4.88            | 4.94        | 7.05            | 4.28        |
| 33.03                    | Octanoic acid               | 1.05              | 0.70        | 1.60            | 1.32        | 1.53            | 0.61        | 0.94            | 0.77        | 1.16            | 0.66        |
| 35.34                    | Decanoic acid               | 0.30              | 0.20        | 0.41            | 0.32        | 0.40            | 0.16        | 0.31            | 0.26        | 0.34            | 0.26        |
| <b>Total</b>             |                             | <b>17.90</b>      |             | <b>28.05</b>    |             | <b>39.17*</b>   |             | <b>18.57</b>    |             | <b>29.21</b>    |             |
| <i>Alcohols</i>          |                             |                   |             |                 |             |                 |             |                 |             |                 |             |
| 1.66                     | 1-Hexanol                   | 5.09              | 2.85        | 5.41            | 2.82        | 4.27            | 3.00        | 6.80            | 5.06        | 9.49            | 6.96        |
| 3.14                     | 2-Propanol, 2-methyl-       | 66.82             | 79.10       | 123.35*         | 59.10       | 108.67          | 74.21       | 104.17          | 66.32       | 101.93          | 49.94       |
| 3.67                     | 2-Propanol                  | 2.70              | 1.66        | 7.88            | 11.20       | 10.72           | 10.59       | 2.88            | 1.41        | 4.06            | 2.35        |
| 3.77                     | Ethanol                     | 6.43              | 1.16        | 12.34           | 10.78       | 13.29           | 14.53       | 5.71            | 1.94        | 5.77            | 1.46        |
| 16.49                    | 3-Buten-1-ol, 3-methyl-     | 0.42              | 0.37        | 0.59            | 0.29        | 0.69            | 0.44        | 1.08*           | 0.80        | 1.08*           | 0.59        |
| 16.92                    | 1-Pentanol                  | 0.21              | 0.16        | 0.25            | 0.18        | 0.29            | 0.26        | 0.67*           | 0.27        | 0.47            | 0.14        |
| <b>Total</b>             |                             | <b>81.67</b>      |             | <b>149.83*</b>  |             | <b>137.93*</b>  |             | <b>121.31</b>   |             | <b>122.79</b>   |             |
| <i>Ethers</i>            |                             |                   |             |                 |             |                 |             |                 |             |                 |             |
| 1.74                     | Propane, 2-ethoxy-2-methyl- | 10.17             | 8.93        | 17.40           | 7.95        | 16.34           | 9.87        | 39.18*          | 29.22       | 71.23*          | 48.06       |
| <b>Total</b>             |                             | <b>10.17</b>      |             | <b>17.40</b>    |             | <b>16.34</b>    |             | <b>39.18*</b>   |             | <b>71.23*</b>   |             |
| <i>Hydrocarbons</i>      |                             |                   |             |                 |             |                 |             |                 |             |                 |             |
| 15.11                    | Cyclopropane, butyl-        | 0.62              | 1.00        | 1.53            | 1.90        | 1.43            | 1.47        | 0.88            | 0.33        | 1.10            | 0.45        |

|                      |                                      |             |      |             |      |              |      |              |      |              |      |
|----------------------|--------------------------------------|-------------|------|-------------|------|--------------|------|--------------|------|--------------|------|
| 21.66                | Benzene, 1,3-bis(1,1-dimethylethyl)- | 0.18        | 0.19 | 0.25        | 0.16 | 0.45         | 0.10 | 0.96*        | 0.53 | 1.62*        | 1.10 |
| <b>Total</b>         |                                      | <b>0.80</b> |      | <b>1.77</b> |      | <b>1.88*</b> |      | <b>1.84*</b> |      | <b>2.72*</b> |      |
| <i>Miscellaneous</i> |                                      |             |      |             |      |              |      |              |      |              |      |
| 28.32                | Acetamide                            | 0.03        | 0.04 | n.d.        | -    | 0.05         | 0.06 | 0.02         | 0.04 | 0.09*        | 0.06 |
| <b>Total</b>         |                                      | <b>0.03</b> |      | <b>n.d.</b> |      | <b>0.05</b>  |      | <b>0.02</b>  |      | <b>0.09*</b> |      |

Data expressed as ng g<sup>-1</sup> SI equivalents; \* indicate significant statistical difference compared to raw milk (p<0.05); n.d., not detected

**Table S2.** VOC profile of raw homogenized milk before and after IR treatment with energy 80.

| Rt                       | Compound                    | Raw milk (n=2) | s.d. (±) | IR80 (n=2)     | s.d. (±) |
|--------------------------|-----------------------------|----------------|----------|----------------|----------|
| <i>Aldehydes</i>         |                             |                |          |                |          |
| 3.39                     | 3-Methyl-butanal            | 1.02           | 1.09     | 0.63           | 0.83     |
| 4.74                     | Pentanal                    | 0.23           | 0.18     | 0.37           | 0.16     |
| 4.84                     | Acetaldehyde                | 0.08           | 0.10     | n.d.           | -        |
| 8.98                     | Hexanal                     | 5.32           | 1.51     | 8.40*          | 2.81     |
| 14.01                    | Heptanal                    | 0.36           | 0.35     | 0.66*          | 0.37     |
| 20.93                    | Nonanal                     | 0.33           | 0.36     | 0.55*          | 0.30     |
| 22.57                    | 2-Furancarboxaldehyde       | 0.06           | 0.10     | 0.17           | 0.22     |
| 23.84                    | Benzaldehyde                | 0.18           | 0.19     | 0.48*          | 0.23     |
| <b>Total</b>             |                             | <b>7.59</b>    |          | <b>11.26*</b>  |          |
| <i>Ketones</i>           |                             |                |          |                |          |
| 2.26                     | 2-Propanone                 | 430.48         | 86.58    | 425.12         | 70.90    |
| 3.12                     | 2-Butanone                  | 130.58         | 14.37    | 129.04         | 32.43    |
| 4.66                     | 2-Pentanone                 | 0.42           | 0.21     | 1.53*          | 0.22     |
| 6.71                     | 4,4-dimethoxy-2-butanone    | 0.03           | 0.06     | n.d.           | -        |
| 13.83                    | 2-Heptanone                 | 0.49           | 0.41     | 0.69           | 0.37     |
| 14.98                    | 4-Methyl-2-heptanone,       | 0.03           | 0.05     | 0.97*          | 0.27     |
| 16.30                    | 4,4-Dimethyl-1-penten-3-one | n.d.           | -        | 0.18           | 0.29     |
| 17.67                    | 3-Hydroxy-2-butanone        | 2.22           | 1.44     | 1.47           | 0.89     |
| 17.81                    | 2-Dodecanone                | 0.05           | 0.05     | 0.23           | 0.14     |
| 20.82                    | 2-Nonanone                  | 0.17           | 0.18     | 0.18           | 0.12     |
| 28.19                    | 4-Penten-2-one              | 0.16           | 0.21     | 0.25*          | 0.20     |
| <b>Total</b>             |                             | <b>564.64</b>  |          | <b>559.65</b>  |          |
| <i>Sulphur compounds</i> |                             |                |          |                |          |
| 1.9                      | Dimethyl sulphide           | 21.09          | 6.49     | 11.02*         | 2.80     |
| 8.32                     | Dimethyl disulphide         | n.d.           | -        | 0.22           | 0.26     |
| 24.52                    | Dimethyl sulphoxide         | 2.57           | 1.81     | 2.71           | 0.94     |
| 31.05                    | Dimethyl sulphone           | 122.68         | 61.89    | 193.41*        | 47.08    |
| <b>Total</b>             |                             | <b>146.35</b>  |          | <b>207.36*</b> |          |
| <i>Carboxylic acids</i>  |                             |                |          |                |          |
| 22.2                     | Acetic acid                 | 6.70           | 5.36     | 4.10           | 1.90     |
| 24.22                    | Propanoic acid              | 1.49           | 0.83     | 0.94*          | 0.35     |
| 24.89                    | 2-Methyl-propanoic acid     | 0.23           | 0.10     | 0.20           | 0.08     |
| 25.14                    | 2,2-Dimethyl-propanoic acid | 0.20           | 0.13     | 0.09*          | 0.10     |
| 26.12                    | Butanoic acid               | 206.66         | 141.32   | 234.77         | 175.73   |

|                 |                                    |               |        |               |       |
|-----------------|------------------------------------|---------------|--------|---------------|-------|
| 26.98           | 3-Methyl-butanoic acid             | 0.57          | 0.58   | 0.37          | 0.21  |
| 28.28           | Pentanoic acid                     | 1.08          | 0.63   | 0.88          | 0.49  |
| 30.28           | Hexanoic acid                      | 102.76        | 106.40 | 110.52        | 74.59 |
| 31.93           | Heptanoic acid                     | 0.87          | 0.66   | 0.69          | 0.41  |
| 33.03           | Octanoic acid                      | 24.51         | 39.77  | 11.34         | 8.64  |
| 34.08           | Nonanoic acid                      | 0.33          | 0.24   | 0.16          | 0.07  |
| 35.34           | Decanoic acid                      | 2.27          | 1.69   | 1.87          | 1.42  |
| <b>Total</b>    |                                    | <b>347.68</b> |        | <b>365.93</b> |       |
| <i>Alcohols</i> |                                    |               |        |               |       |
| 3.67            | 2-Propanol                         | 0.27          | 0.17   | 1.18          | 1.91  |
| 3.77            | Ethanol                            | 0.82          | 0.51   | 0.65          | 0.72  |
| 12.67           | 1-Butanol                          | 0.59          | 0.36   | 0.73*         | 0.34  |
| 13.87           | 2-Hexanol                          | 0.63          | 0.50   | 0.52          | 0.32  |
| 15.36           | 3-Methyl-1-Butanol                 | 0.28          | 0.35   | 0.06          | 0.11  |
| 16.92           | 1-Pentanol                         | 0.19          | 0.15   | 1.53*         | 0.64  |
| 19.18           | 1-Hepten-4-ol                      | 0.38          | 0.24   | 0.52*         | 0.33  |
| <b>Total</b>    |                                    | <b>3.17</b>   |        | <b>5.18*</b>  |       |
| <i>Furans</i>   |                                    |               |        |               |       |
| 15.99           | 3-methyl-(3H)-isobenzofuran-1-one  | 0.04          | 0.04   | 0.06          | 0.09  |
| 25.93           | dihydro-2(3H)-furanone             | 0.27          | 0.19   | 0.30          | 0.35  |
| 29.09           | Tetrahydro-6-methyl-2H-pyran-2-one | 0.05          | 0.06   | 0.17          | 0.21  |
| <b>Total</b>    |                                    | <b>0.36</b>   |        | <b>0.53</b>   |       |
| <i>Esters</i>   |                                    |               |        |               |       |
| 3.00            | Ethyl acetate                      | 0.59          | 1.18   | 0.12          | 0.14  |
| 5.02            | Butanoic acid, methyl ester        | 2.39          | 2.52   | 1.40          | 1.75  |
| 14.27           | Hexanoic acid methyl ester         | 2.35          | 2.82   | 2.06          | 2.89  |
| 15.24           | Ethanedioic acid, dibutyl ester    | 0.01          | 0.01   | 0.26          | 0.30  |
| 26.02           | Benzoic acid methyl ester          | n.d.          | -      | 0.11          | 0.23  |
| 26.74           | Phosphoric acid, triethyl ester    | 0.02          | 0.03   | n.d.          | -     |
| <b>Total</b>    |                                    | <b>5.36</b>   |        | <b>3.96</b>   |       |

Data expressed as ng g<sup>-1</sup> SI equivalents; \* indicate significant statistical difference compared to raw milk (p<0.05); n.d., not detected
